# Supplementary material
Source: PubMed Central journal article supplement (PMC6744356)
Supplement: NIHMS1030349-supplement-1.pdf [file NIHMS1030349-supplement-1.pdf]

**Table S1.** CU<sup>a</sup> Descriptive Statistics

|                     | <i>Age 2</i>   | <i>Age 3</i>   |
|---------------------|----------------|----------------|
|                     | M(SD)          | M(SD)          |
| Female Participants | 1.45<br>(1.44) | 1.13<br>(1.21) |
| Male Participants   | 1.62<br>(1.51) | 1.39<br>(1.41) |

Note: CU=Callous-Unemotional Behaviors

<sup>a</sup>Means are for non-transformed CU scores  
for ease of interpretation.

**Table S2.** Twin Intraclass and Cross Correlations

|                         | MZ             | DZ             |
|-------------------------|----------------|----------------|
| Intraclass Correlations |                |                |
| CU <sup>a</sup> Age 2   | .72 (.64, .78) | .41 (.28, .53) |
| CU Age 3                | .63 (.52, .71) | .41 (.27, .52) |
| NEG Age 2               | .88 (.84, .91) | .69 (.60, .75) |
| NEG Age 3               | .84 (.78, .88) | .63 (.53, .70) |
| Cross-Correlations      |                |                |
| CU 2—NEG 2              | .32 (.23, .41) | .22 (.12, .31) |
| CU 3—NEG 3              | .30 (.20, .39) | .19 (.09, .29) |
| NEG 2—CU 3              | .26 (.17, .35) | .17 (.07, .27) |
| CU 2—NEG 3              | .31 (.22, .39) | .17 (.07, .27) |
| NEG 2—NEG 3             | .64 (.58, .70) | .55 (.47, .62) |
| CU 2—CU 3               | .41 (.32, .49) | .27 (.17, .37) |

Note: CU=Callous-Unemotional Behaviors;

NEG=negative parenting; MZ=monozygotic; DZ=dizygotic.

<sup>a</sup>CU scores residualized for sex and conduct problems.

**Table S3.** Fit Statistics for Cross-Lagged Models

| <i>CU<sup>a</sup> and Negative Parenting</i> |                                   |             |                |             |             |                |             |                                    |             |             |
|----------------------------------------------|-----------------------------------|-------------|----------------|-------------|-------------|----------------|-------------|------------------------------------|-------------|-------------|
| Model                                        | Overall Fit of Model <sup>b</sup> |             |                |             |             |                |             | Relative Fit of Model <sup>c</sup> |             |             |
|                                              | -2LL                              | df          | $\chi^2$       | $\Delta df$ | p           | AIC            | RMSEA       | $\Delta\chi^2$                     | $\Delta df$ | p           |
| Saturated                                    | 6304.453                          | 2344        |                |             |             |                |             |                                    |             |             |
| Full                                         | 6397.990                          | 2394        | 93.537         | 50          | .000        | -6.463         | .053        |                                    |             |             |
| Drop CU stability                            | 6466.014                          | 2395        | 161.561        | 51          | .000        | 59.561         | .083        | 68.024                             | 1           | .000        |
| Drop NEG stability                           | 6636.638                          | 2395        | 332.185        | 51          | .000        | 230.185        | .133        | 238.649                            | 1           | .000        |
| Drop CU→NEG                                  | 6403.858                          | 2395        | 99.405         | 51          | .000        | -2.595         | .056        | 5.868                              | 1           | .015        |
| Drop NEG→CU                                  | 6399.689                          | 2395        | 95.236         | 51          | .000        | -6.764         | .053        | 1.699                              | 1           | .192        |
| <b>Best-Fit Model</b>                        | <b>6404.658</b>                   | <b>2403</b> | <b>100.205</b> | <b>59</b>   | <b>.001</b> | <b>-17.795</b> | <b>.047</b> | <b>6.668</b>                       | <b>9</b>    | <b>.672</b> |

Note: Best fitting model indicated in bold. -2LL=Likelihood Statistic;  $\chi^2$ =Chi-square fit statistic;

AIC=Akaike’s Information Criterion; CU=Callous-Unemotional Behaviors; *df*=Degrees of freedom;

NEG=negative parenting; POS=positive parenting; RMSEA=Root Mean Square Error of Approximation.

<sup>a</sup>CU residualized for sex and conduct problems.

<sup>b</sup>Overall fit of the model is determined by the difference in -2LL of the model and that of a saturated model.

<sup>c</sup>Relative fit of the model determined by the  $\chi^2$  difference ( $\Delta\chi^2$ ) between full bivariate ACE model and reduced model.

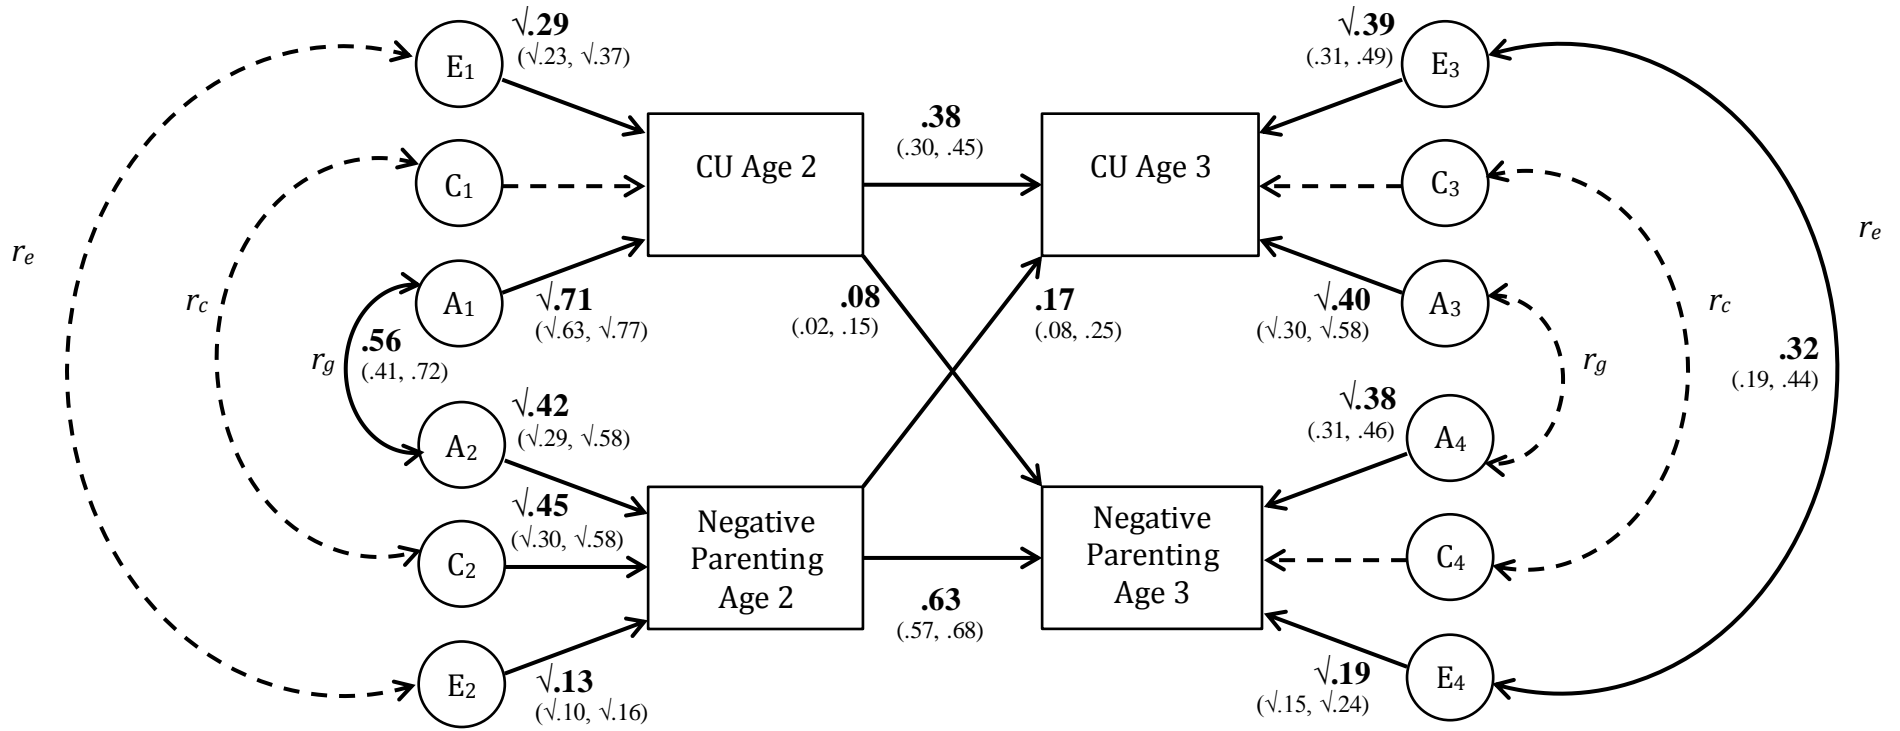

**Figure S1. Cross-Lagged Results for Negative Parenting and Callous-Unemotional Behaviors without controlling for conduct problems**
